# Supplementary material for: Merkel Cell Polyomavirus Infection, Large T Antigen, Retinoblastoma Protein and Outcome in Merkel Cell Carcinoma
Source: Oxford University Press journal article supplement (doi:10.1158/1078-0432.ccr-10-3363), 2011-06-03
Supplement: 10780432ccr103363-sup-sdata_3.pdf [file 10780432ccr103363-sup-sdata_3.pdf]

**Supplementary Table 3.** Associations of MCPyV large T-antigen (LTA) expression with expression of 10 other proteins in Merkel cell carcinoma

| Variable                      | <u>MCPyV LTA expression</u> |                |
|-------------------------------|-----------------------------|----------------|
|                               | Absent (n=30)               | Present (n=61) |
|                               | No. (%)                     | No. (%)        |
| <b>RB<sup>a</sup></b>         |                             |                |
| 0% positive                   | 26 (86.7)                   | 0 (0)          |
| 1-10% positive                | 0 (0)                       | 0 (0)          |
| 11-19% positive               | 0 (0)                       | 0 (0)          |
| 20-50% positive               | 0 (0)                       | 1 (1.6)        |
| >50% positive                 | 4 (13.3)                    | 60 (98.4)      |
| <b>Phospho-RB<sup>b</sup></b> |                             |                |
| 0% positive                   | 7 (24.1)                    | 9 (15.3)       |
| 1-10% positive                | 2 (6.9)                     | 9 (15.3)       |
| 11-19% positive               | 1 (3.4)                     | 6 (10.2)       |
| 20-50% positive               | 13 (44.8)                   | 20 (33.9)      |
| >50% positive                 | 6 (20.9)                    | 15 (25.4)      |
| N.A.                          | 1                           | 2              |
| <b>p53<sup>a</sup></b>        |                             |                |
| 0% positive                   | 9 (29.0)                    | 31 (54.4)      |
| 1-10% positive                | 3 (10.0)                    | 14 (24.6)      |
| 11-19% positive               | 5 (16.7)                    | 8 (14.0)       |
| 20-50% positive               | 1 (3.3)                     | 2 (3.5)        |
| >50% positive                 | 12 (40.0)                   | 2 (3.5)        |

|                        |           |            |
|------------------------|-----------|------------|
| N.A.                   | 0         | 4          |
| Ki-67 <sup>a</sup>     |           |            |
| 0% positive            | 1 (3.3)   | 1 (1.7)    |
| 1-10% positive         | 0 (0)     | 0 (0)      |
| 11-19% positive        | 0 (0)     | 0 (0)      |
| 20-50% positive        | 4 (13.3)  | 13 (21.7)  |
| >50% positive          | 25 (83.3) | 46 (76.7)  |
| N.A.                   | 0         | 1          |
| Cyclin E <sup>a</sup>  |           |            |
| 0% positive            | 1 (3.7)   | 1 (1.8)    |
| 1-10% positive         | 1 (3.7)   | 0 (0)      |
| 11-19% positive        | 2 (7.4)   | 0 (0)      |
| 20-50% positive        | 5 (16.7)  | 3 (5.4)    |
| >50% positive          | 18 (66.7) | 52 (92.9)  |
| N.A.                   | 3         | 5          |
| Cyclin D1 <sup>a</sup> |           |            |
| 0% positive            | 26 (89.7) | 55 (100.0) |
| 1-10% positive         | 1 (3.4)   | 0 (0)      |
| 11-19% positive        | 0 (0)     | 0 (0)      |
| 20-50% positive        | 1 (3.4)   | 0 (0)      |
| >50% positive          | 1 (3.4)   | 0 (0)      |
| N.A.                   | 1         | 6          |
| p16 <sup>a</sup>       |           |            |
| 0% positive            | 1 (3.3)   | 1 (1.7)    |
| 1-10% positive         | 0 (0)     | 0 (0)      |

|                                        |           |           |
|----------------------------------------|-----------|-----------|
| 11-19% positive                        | 0 (0)     | 0 (0)     |
| 20-50% positive                        | 1 (3.3)   | 0 (0)     |
| >50% positive                          | 28 (93.3) | 57 (98.3) |
| N.A.                                   | 0         | 3         |
| p21 <sup>a</sup>                       |           |           |
| 0% positive                            | 3 (10.3)  | 2 (3.4)   |
| 1-10% positive                         | 6 (20.7)  | 22 (37.9) |
| 11-19% positive                        | 4 (13.8)  | 6 (10.3)  |
| 20-50% positive                        | 8 (27.6)  | 17 (29.3) |
| >50% positive                          | 8 (27.6)  | 11 (19.0) |
| N.A.                                   | 1         | 3         |
| p27                                    |           |           |
| 0% positive                            | 3 (10.0)  | 1 (1.7)   |
| 1-10% positive                         | 1 (3.3)   | 0 (0)     |
| 11-19% positive                        | 9 (30.0)  | 13 (21.7) |
| 20-50% positive                        | 7 (23.3)  | 19 (31.7) |
| >50% positive                          | 10 (33.3) | 27 (45.0) |
| N.A.                                   | 0         | 1         |
| p27 (staining intensity)               |           |           |
| Negative                               | 3 (10.0)  | 1 (1.7)   |
| Faint                                  | 2 (6.7)   | 7 (11.7)  |
| Intermediate                           | 16 (53.3) | 23 (38.3) |
| Strong                                 | 9 (30.0)  | 29 (48.3) |
| N.A.                                   | 0         | 1         |
| MDM2 (staining intensity) <sup>d</sup> |           |           |

|              |           |           |
|--------------|-----------|-----------|
| Negative     | 27 (93.1) | 53 (94.6) |
| Faint        | 2 (6.9)   | 3 (5.4)   |
| Intermediate | 0 (0)     | 0 (0)     |
| Strong       | 0 (0)     | 0 (0)     |
| N.A.         | 1         | 5         |

---

<sup>a</sup>Not classified for staining intensity due to little variation in staining intensity (RB, Ki-67, cyclin E, cyclin D1, p16, p21) or because grading based on the percentage of positive nuclei is conventional (p53).

<sup>b</sup>Expression intensity varied from faint to strong within TMA cores.

<sup>c</sup>Uniformly faint staining in the few positive cases.
